# Supplementary material for: A theoretical study of the intramolecular charge transfer in 4-(dimethylamino)benzethyne
Source: Royal Society of Chemistry journal article supplement (doi:10.1039/c4cp03436h), 2014-01-01
Supplement: c4cp03436h1.pdf [file c4cp03436h1.pdf]

*Electronic Supplementary Information*

*(Total of 6 pages)*

for

*A Theoretical Study of the Intramolecular*

*Charge Transfer in*

*4-(Dimethylamino)benzethyne*

*Javier Segarra-Martí<sup>1,2,a)</sup> and Pedro B. Coto<sup>3,b)</sup>*

<sup>1</sup>Instituto de Ciencia Molecular, Universitat de València, Apartado 22085, ES-46071 Valencia, Spain.

<sup>2</sup> Current Address: Dipartimento di Chimica “G. Ciamician”, Università di Bologna, Via Selmi 2, IT-40126 Bologna, Italy

<sup>3</sup>Institut für Theoretische Physik, Theoretische Festkörperphysik, Friedrich-Alexander-Universität Erlangen-Nürnberg, Erlangen D-91058, Germany.

a) [Javier.Segarra@uv.es](mailto:Javier.Segarra@uv.es)

b) [pedro.brana-coto@physik.uni-erlangen.de](mailto:pedro.brana-coto@physik.uni-erlangen.de)

## Table of Contents

|                                                                                                                                                                                |    |
|--------------------------------------------------------------------------------------------------------------------------------------------------------------------------------|----|
| <b>Table S1.</b> CASSCF/ANO-S-VDZP optimized Franck-Condon ground-state geometry (in Å) of the DMABE <i>in vacuo</i> .....                                                     | S3 |
| <b>Table S2.</b> CASSCF/ANO-S-VDZP optimized Locally Excited (LE) excited-state minimum geometry (in Å) of the DMABE <i>in vacuo</i> .....                                     | S3 |
| <b>Table S3.</b> CASSCF/ANO-S-VDZP optimized $\pi\sigma^*$ excited-state minimum geometry (in Å) of the DMABE <i>in vacuo</i> .....                                            | S4 |
| <b>Table S4.</b> CASSCF/ANO-S-VDZP optimized partially-Twisted Intramolecular Charge Transfer (pTICT) excited-state minimum geometry (in Å) of the DMABE <i>in vacuo</i> ..... | S4 |
| <b>Table S5.</b> CASSCF/ANO-S-VDZP optimized Twisted Intramolecular Charge Transfer (TICT) excited-state minimum geometry (in Å) of the DMABE <i>in vacuo</i> .....            | S5 |
| <b>Figure S1.</b> Orbitals comprising the (14,13) active space employed in the CASSCF calculations of DMABE.....                                                               | S6 |

**Table S1.** CASSCF/ANO-S-VDZP optimized Franck-Condon ground-state geometry (in Å) of the DMABE *in vacuo*.

|     |             |             |             |
|-----|-------------|-------------|-------------|
| C1  | -0.50031472 | -0.81399696 | 0.08253325  |
| C2  | 0.90743828  | -0.81399696 | 0.08253325  |
| C3  | -1.13601209 | 0.44205024  | 0.08253325  |
| C4  | 1.63321653  | 0.37069988  | 0.09943359  |
| C5  | -0.40671380 | 1.62459127  | 0.09904284  |
| C6  | 0.99075602  | 1.61180515  | 0.11055542  |
| C7  | -0.55000589 | -3.21135226 | -0.31294915 |
| C8  | -2.61701642 | -1.94084057 | -0.31243548 |
| C9  | 1.75442670  | 2.85421910  | 0.12430259  |
| C10 | 2.38845605  | 3.88579059  | 0.13752807  |
| N11 | -1.23501325 | -2.00929192 | 0.12085693  |
| H12 | -1.23539427 | -4.04565969 | -0.24970367 |
| H13 | -3.05187628 | -2.92913806 | -0.24926044 |
| H14 | -0.18129385 | -3.14682596 | -1.33968101 |
| H15 | -2.72632932 | -1.58248688 | -1.33904235 |
| H16 | 0.28440196  | -3.43904939 | 0.33810297  |
| H17 | -3.19674305 | -1.29932349 | 0.33896621  |
| H18 | 2.70600049  | 0.32820727  | 0.10075068  |
| H19 | -0.92905708 | 2.56258374  | 0.09968714  |
| H20 | 1.45331028  | -1.73393148 | 0.07315797  |
| H21 | -2.20331039 | 0.51368567  | 0.07335548  |
| H22 | 2.94000044  | 4.78316484  | 0.14920283  |

**Table S2.** CASSCF/ANO-S-VDZP optimized Locally Excited (LE) excited-state minimum geometry (in Å) of the DMABE *in vacuo*.

|     |             |             |             |
|-----|-------------|-------------|-------------|
| C1  | -0.49200815 | -0.82770775 | 0.06536454  |
| C2  | 0.94241185  | -0.82770775 | 0.06536454  |
| C3  | -1.17737549 | 0.43238330  | 0.06536454  |
| C4  | 1.67606159  | 0.40239202  | 0.06073789  |
| C5  | -0.44731597 | 1.66461608  | 0.06073576  |
| C6  | 0.98529522  | 1.65748795  | 0.05936354  |
| C7  | -0.51883321 | -3.25207545 | -0.20624175 |
| C8  | -2.60899261 | -2.00958764 | -0.20589889 |
| C9  | 1.71941886  | 2.89247887  | 0.05540936  |
| C10 | 2.34033863  | 3.93705032  | 0.05085739  |
| N11 | -1.20199009 | -2.02208397 | 0.14589045  |
| H12 | -1.19261061 | -4.08265686 | -0.04579745 |
| H13 | -3.01667497 | -2.99834217 | -0.04545808 |
| H14 | -0.19256591 | -3.27085345 | -1.24803723 |
| H15 | -2.78163496 | -1.73183858 | -1.24762384 |
| H16 | 0.34140106  | -3.41383817 | 0.42897320  |
| H17 | -3.16194607 | -1.33124469 | 0.42952513  |
| H18 | 2.74714732  | 0.38662719  | 0.05561281  |
| H19 | -0.97293267 | 2.59799698  | 0.05557670  |
| H20 | 1.49483718  | -1.74104785 | 0.06049467  |

|     |             |            |            |
|-----|-------------|------------|------------|
| H21 | -2.24366488 | 0.48127435 | 0.06044524 |
| H22 | 2.87857080  | 4.84253135 | 0.04871416 |

**Table S3.** CASSCF/ANO-S-VDZP optimized  $\pi\sigma^*$  excited-state minimum geometry (in Å) of the DMABE *in vacuo*.

|     |          |          |          |
|-----|----------|----------|----------|
| C1  | -1.10898 | -0.04492 | 0.00000  |
| C2  | -0.41184 | -1.28824 | 0.00000  |
| C3  | -0.32826 | 1.14438  | 0.00000  |
| C4  | 0.95667  | -1.33568 | 0.00000  |
| C5  | 1.04201  | 1.09109  | 0.00000  |
| C6  | 1.74961  | -0.14623 | 0.00000  |
| C7  | -3.24544 | -1.22247 | 0.00000  |
| C8  | -3.15867 | 1.27637  | 0.00000  |
| C9  | 3.17999  | -0.16030 | 0.00000  |
| C10 | 3.96286  | -1.25735 | 0.00000  |
| N11 | -2.46340 | 0.00155  | 0.00000  |
| H12 | -4.29453 | -0.97009 | 0.00000  |
| H13 | -4.22278 | 1.09776  | 0.00000  |
| H14 | -3.04376 | -1.82214 | 0.88257  |
| H15 | -3.04376 | -1.82214 | -0.88257 |
| H16 | -2.91589 | 1.86075  | 0.88267  |
| H17 | -2.91589 | 1.86075  | -0.88267 |
| H18 | 1.46976  | -2.27605 | 0.00000  |
| H19 | 1.61286  | 1.99954  | 0.00000  |
| H20 | -0.95764 | -2.20900 | 0.00000  |
| H21 | -0.80648 | 2.10185  | 0.00000  |
| H22 | 5.04232  | -1.17072 | 0.00000  |

**Table S4.** CASSCF/ANO-S-VDZP optimized partially-Twisted Intramolecular Charge Transfer (pTICT) excited-state minimum geometry (in Å) of the DMABE *in vacuo*.

|     |             |             |             |
|-----|-------------|-------------|-------------|
| C1  | -0.47195548 | -0.80403208 | 0.00000030  |
| C2  | 0.96453852  | -0.80403208 | 0.00000030  |
| C3  | -1.17222020 | 0.45021843  | 0.00000030  |
| C4  | 1.64942546  | 0.38292064  | 0.01347886  |
| C5  | -0.46972239 | 1.62683379  | -0.01347826 |
| C6  | 0.96502553  | 1.64402972  | 0.00000030  |
| C7  | -0.93553384 | -2.99326291 | -1.01296678 |
| C8  | -2.15746320 | -2.27600454 | 1.01296502  |
| C9  | 1.68881397  | 2.87708911  | 0.00000030  |
| C10 | 2.30724987  | 3.93066607  | 0.00000030  |
| N11 | -1.16912878 | -1.99174628 | 0.00000030  |
| H12 | -1.13564619 | -3.98155778 | -0.61899989 |
| H13 | -2.92282420 | -2.93250567 | 0.61899746  |
| H14 | -1.60388221 | -2.79959378 | -1.85372462 |
| H15 | -2.59201041 | -1.35372079 | 1.36823137  |

|     |             |             |             |
|-----|-------------|-------------|-------------|
| H16 | 0.08157513  | -2.92308402 | -1.36823716 |
| H17 | -1.66255966 | -2.76514941 | 1.85372523  |
| H18 | 2.72289567  | 0.36884267  | 0.02915744  |
| H19 | -1.00531155 | 2.55725345  | -0.02915683 |
| H20 | 1.49810668  | -1.73509468 | 0.04974844  |
| H21 | -2.24526659 | 0.46221837  | -0.04974783 |
| H22 | 2.83987538  | 4.83805862  | 0.00000030  |

**Table S5.** CASSCF/ANO-S-VDZP optimized Twisted Intramolecular Charge Transfer (TICT) excited-state minimum geometry (in Å) of the DMABE *in vacuo*.

|     |          |          |          |
|-----|----------|----------|----------|
| C1  | -1.12005 | 0.00000  | 0.00000  |
| C2  | -0.40337 | -1.24102 | 0.00000  |
| C3  | -0.40337 | 1.24102  | 0.00000  |
| C4  | 0.96351  | -1.22876 | 0.00000  |
| C5  | 0.96351  | 1.22876  | 0.00000  |
| C6  | 1.70546  | 0.00000  | 0.00000  |
| C7  | -3.25082 | 0.00000  | -1.25849 |
| C8  | -3.25082 | 0.00000  | 1.25849  |
| C9  | 3.13905  | 0.00000  | 0.00000  |
| C10 | 4.36293  | 0.00000  | 0.00000  |
| N11 | -2.52853 | 0.00000  | 0.00000  |
| H12 | -4.32092 | 0.00000  | -1.10437 |
| H13 | -4.32092 | 0.00000  | 1.10437  |
| H14 | -2.93870 | 0.87656  | -1.81530 |
| H15 | -2.93870 | -0.87656 | 1.81530  |
| H16 | -2.93870 | 0.87656  | 1.81530  |
| H17 | -2.93870 | -0.87656 | -1.81530 |
| H18 | 1.49705  | -2.16120 | 0.00000  |
| H19 | 1.49705  | 2.16120  | 0.00000  |
| H20 | -0.93303 | -2.17777 | 0.00000  |
| H21 | -0.93303 | 2.17777  | 0.00000  |
| H22 | 5.41446  | 0.00000  | 0.00000  |

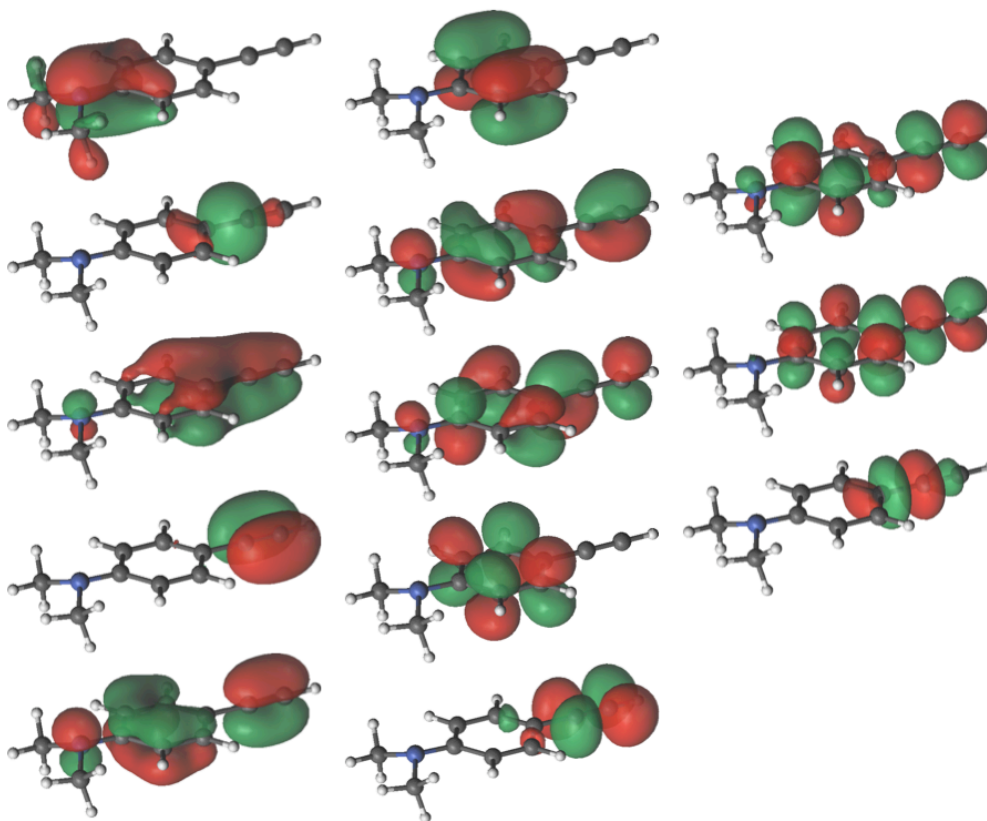

**Figure S1.** Orbitals comprising the (14,13) active space employed in the CASSCF calculations of DMABE.
